# Supplementary material for: Non-Responsive and Refractory Coeliac Disease: Experience from the NHS England National Centre
Source: MDPI journal article supplement (doi:10.3390/nu14132776), 2022-07-05
Supplement: s1 [file s1]

**Table S1.** Summary of the diagnostic criteria for different pathologies. SBBO = small bowel bacterial overgrowth; IBS = irritable bowel syndrome; IBD = inflammatory bowel disease; RCD = refractory coeliac disease; EATL = enteropathy associated T cell lymphoma

| Disease category                  | Diagnostic criteria                                                                                                                                                                                                                                                                                                                                                   |
|-----------------------------------|-----------------------------------------------------------------------------------------------------------------------------------------------------------------------------------------------------------------------------------------------------------------------------------------------------------------------------------------------------------------------|
| Dietary gluten exposure           | Review by specialist dietitian                                                                                                                                                                                                                                                                                                                                        |
| Supersensitive                    | Review by specialist dietitian and symptomatic improvement on a wheat and gluten contamination elimination diet                                                                                                                                                                                                                                                       |
| Gastro-oesophageal reflux disease | Upper GI endoscopy plus/ minus pH monitoring                                                                                                                                                                                                                                                                                                                          |
| Reflux dysmotility                | Oesophageal manometry                                                                                                                                                                                                                                                                                                                                                 |
| H pylori                          | CLO test or gastric biopsies                                                                                                                                                                                                                                                                                                                                          |
| SBBO                              | Glucose hydrogen breath tests                                                                                                                                                                                                                                                                                                                                         |
| Lactose/ fructose intolerance     | Breath tests                                                                                                                                                                                                                                                                                                                                                          |
| Pancreatic exocrine insufficiency | Faecal elastase testing                                                                                                                                                                                                                                                                                                                                               |
| Bile acid diarrhoea               | SeHCAT scan                                                                                                                                                                                                                                                                                                                                                           |
| IBS                               | Symptoms which met the Rome criteria for IBS and in whom other causes had been ruled out                                                                                                                                                                                                                                                                              |
| Microscopic colitis               | Relevant symptoms and histological assessment of colonic biopsies                                                                                                                                                                                                                                                                                                     |
| IBD                               | Relevant symptoms and histological assessment of colonic biopsies                                                                                                                                                                                                                                                                                                     |
| RCD1                              | Typical clinical manifestations of CD plus evidence of Marsh 3 lesions on repeat duodenal biopsy, that have persisted, or recurred, despite strict adherence to a GFD (as assessed by a specialist dietitian) for at least 12 months. The IEL phenotype within the duodenal tissue is within normal limits. Other causes of villous atrophy have been excluded.[4,10] |
| RCD2                              | As in RCD1, without the absolute requirement for 12 months on a GFD, but with the presence of $\geq 40\%$ aberrant IEL phenotype on IHC assessment, or $\geq 20\%$ aberrant IEL phenotype on flow cytometry, and/ or the presence of a detectable clonal TCR rearrangement, in duodenal biopsy specimens.[10,11,19]                                                   |
| Secondary EATL                    | WHO Classification of Tumours of Haematopoietic and Lymphoid Tissues. The patient is already known to have RCD2.[20]                                                                                                                                                                                                                                                  |
| <i>De novo</i> EATL               | WHO Classification of Tumours of Haematopoietic and Lymphoid Tissues. History of typical CD and/ or evidence of Marsh 3 lesions in non-involved mucosa;[20] no prior history, or evidence, of RCD2.                                                                                                                                                                   |
| Other GI malignancies             | WHO Classification of Tumours of Haematopoietic and Lymphoid Tissues.                                                                                                                                                                                                                                                                                                 |

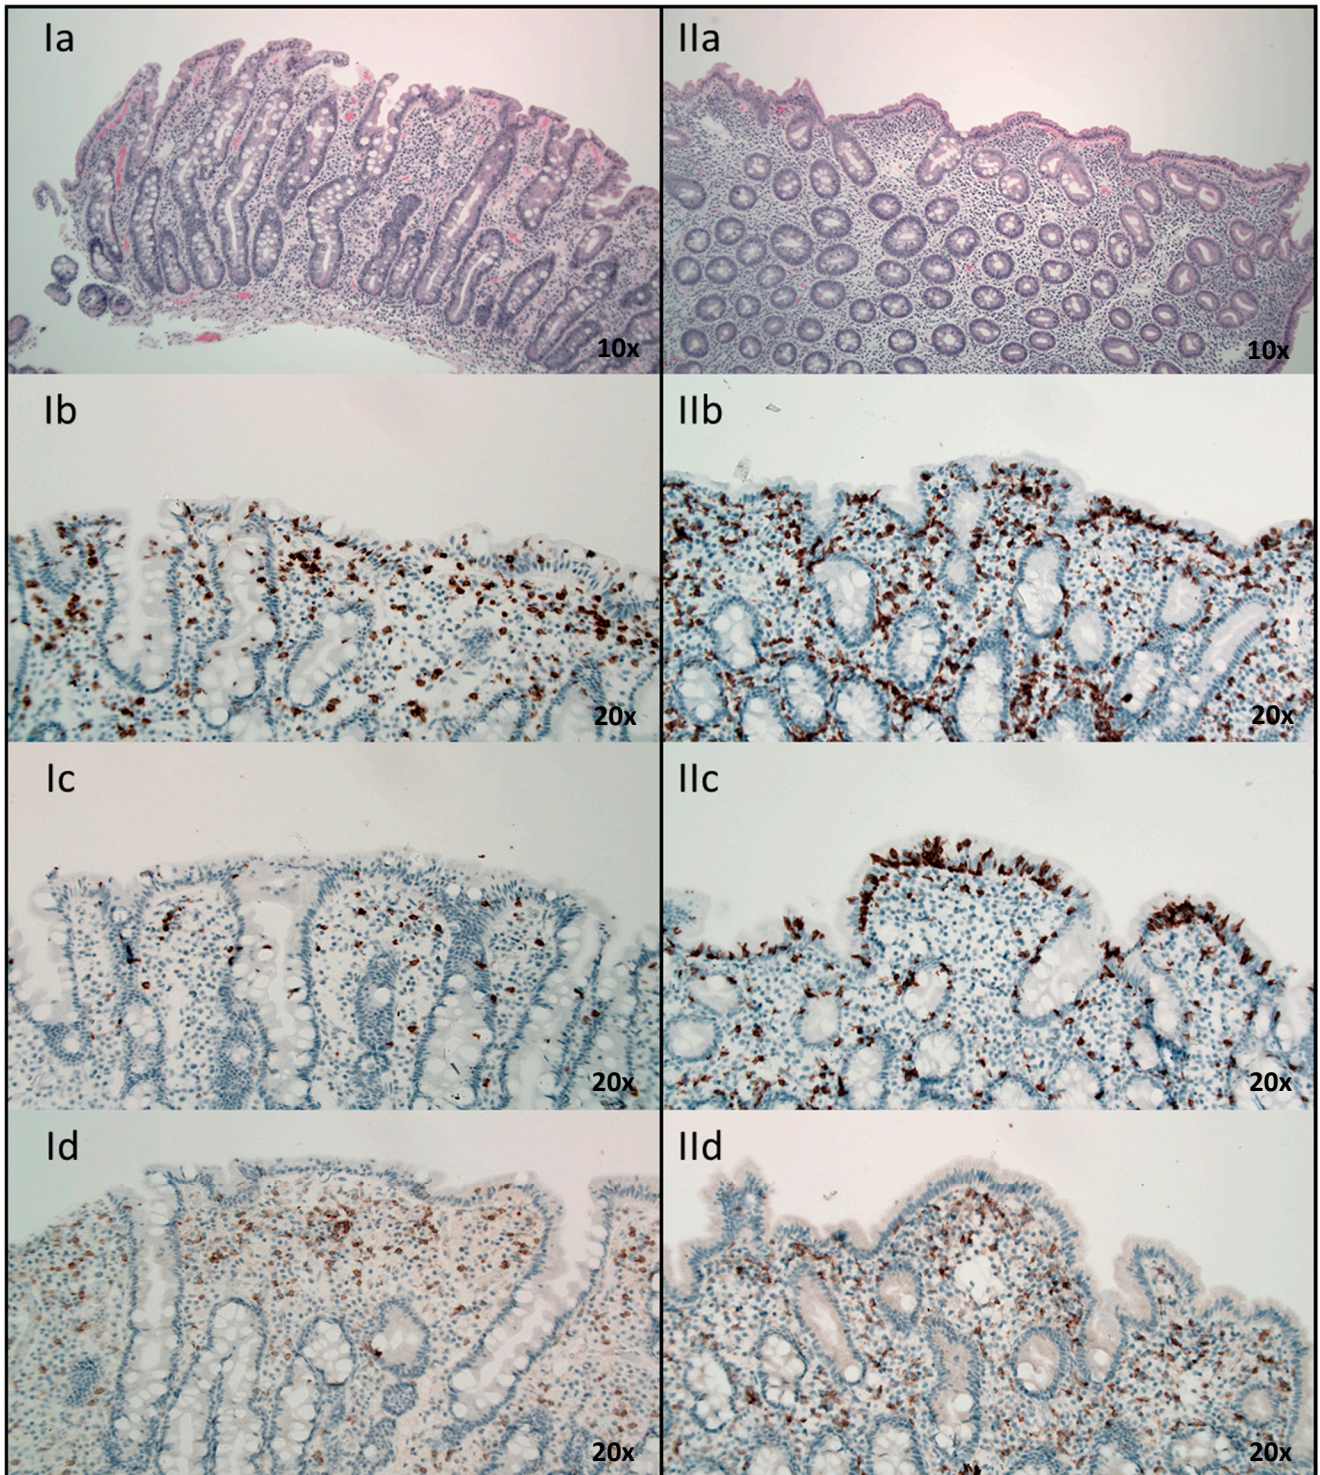

**Figure S1.** Example of immunohistochemical assessment of duodenal biopsy sections from a patient with RCD2 (Ia-d; left) and typical active CD (IIa-d; right). Ia: Haematoxylin and eosin staining in RCD2 showing complete villous atrophy and crypt hyperplasia; Ib: CD3 staining in RCD2 showing increased intra-epithelial lymphocytes (IELs); Ic: CD8 staining in RCD2 showing that virtually no IELs mark with CD8; Id: CD4 staining in RCD2 confirming absence of T helper cells in the epithelium. IIa: Haematoxylin and eosin staining in typical CD showing complete villous atrophy and crypt hyperplasia; IIb: CD3 staining in typical active CD showing increased IELs; IIc: CD8 staining in typical CD showing that IELs that mark with CD3 also mark with CD8; IId: CD4 staining in typical CD confirming absence of T helper cells in the epithelium.

A.

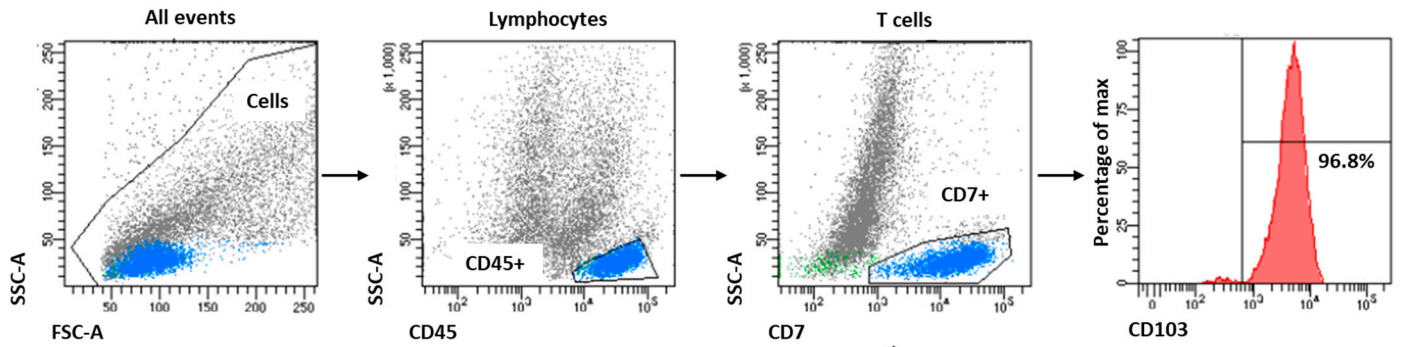

B.

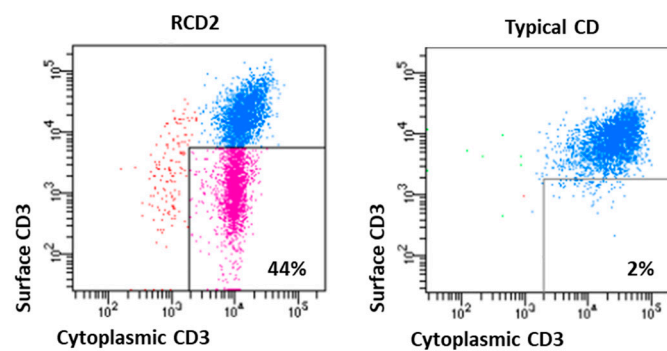

**Figure S2.** Example flow cytometry gating strategy for identifying the frequency of the aberrant intraepithelial lymphocyte (IEL) population (surface (s)CD3- cytoplasmic (c)CD3+) isolated from duodenal biopsy specimens [12]. A. Lymphocytes were identified as CD45+ with low sideward scatter. Almost all CD45+CD7+ T cells were positive for CD103, which is known to be highly expressed by IELs (19). B. The percentage of sCD3-cCD3+ lymphocytes were enumerated in CD45+CD7+ cells. Representative plots with frequencies of the aberrant phenotype in RCD2 (left) and typical active CD (right).
